# Supplementary material
Source: MDPI journal article supplement (https://www.mdpi.com/1999-4907/8/12/480)
Supplement: s1 [file s1]

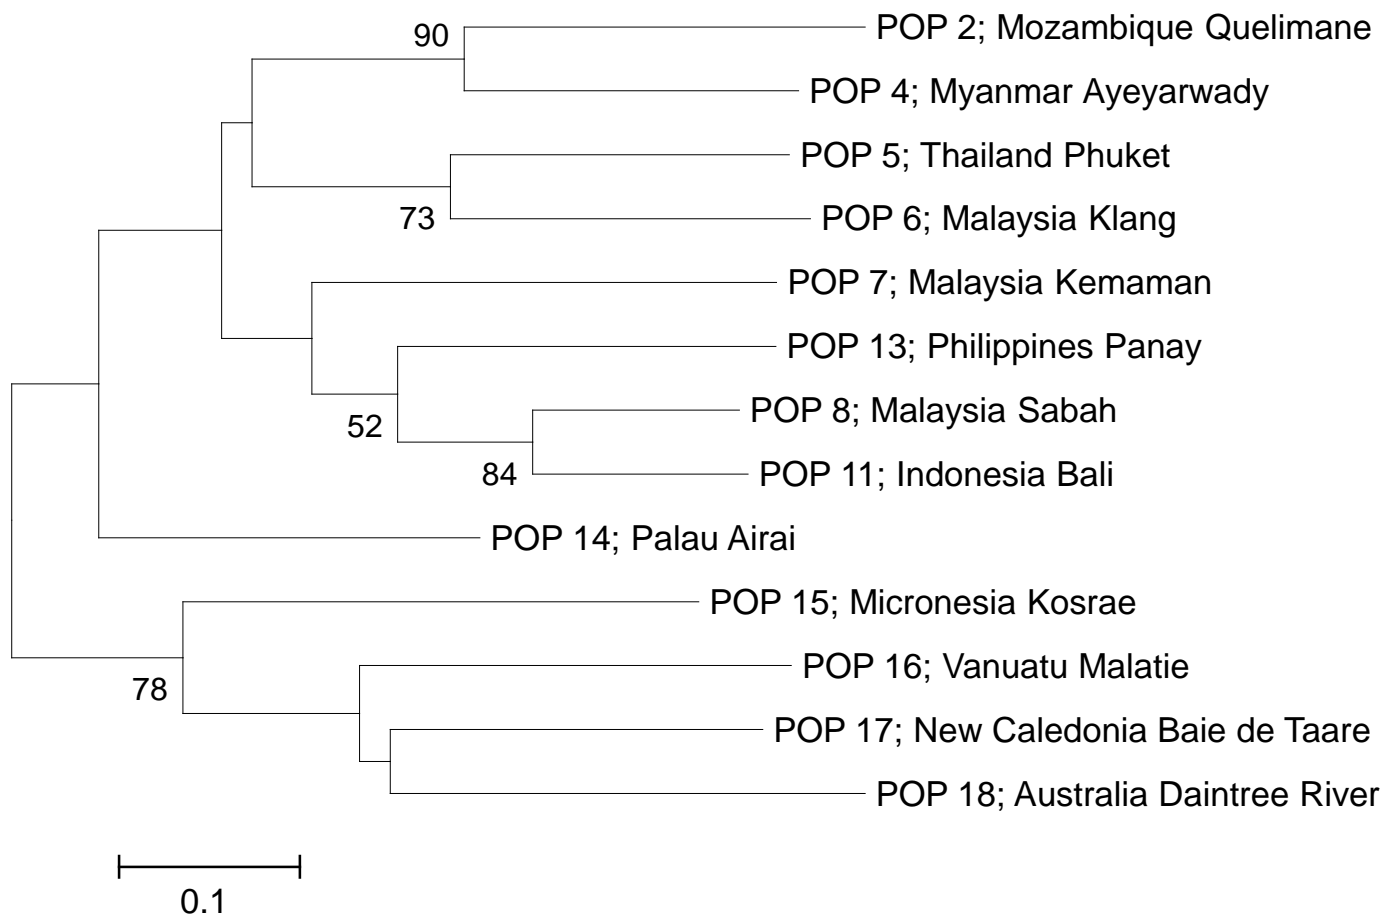

**Fig S1** Neighbor-joining (NJ) tree for 18 populations of *Xylocarpus granatum* based on nuclear SSR dataset. Genetic distances were calculated by Populations 1.2.30. Statistical confidence of the topology was evaluated by 1000 bootstrap replicates. .
